# Supplementary material for: Europatitan eastwoodi, a new sauropod from the lower Cretaceous of Iberia in the initial radiation of somphospondylans in Laurasia
Source: PeerJ journal article supplement (doi:10.7717/peerj.3409), 2017-06-27
Supplement: Fig._S2._Detail_of_the_articulated_caudals_and_the_dorsal_vertebra_in_the_site.pdf [file Fig._S2._Detail_of_the_articulated_caudals_and_the_dorsal_vertebra_in_the_site.pdf]

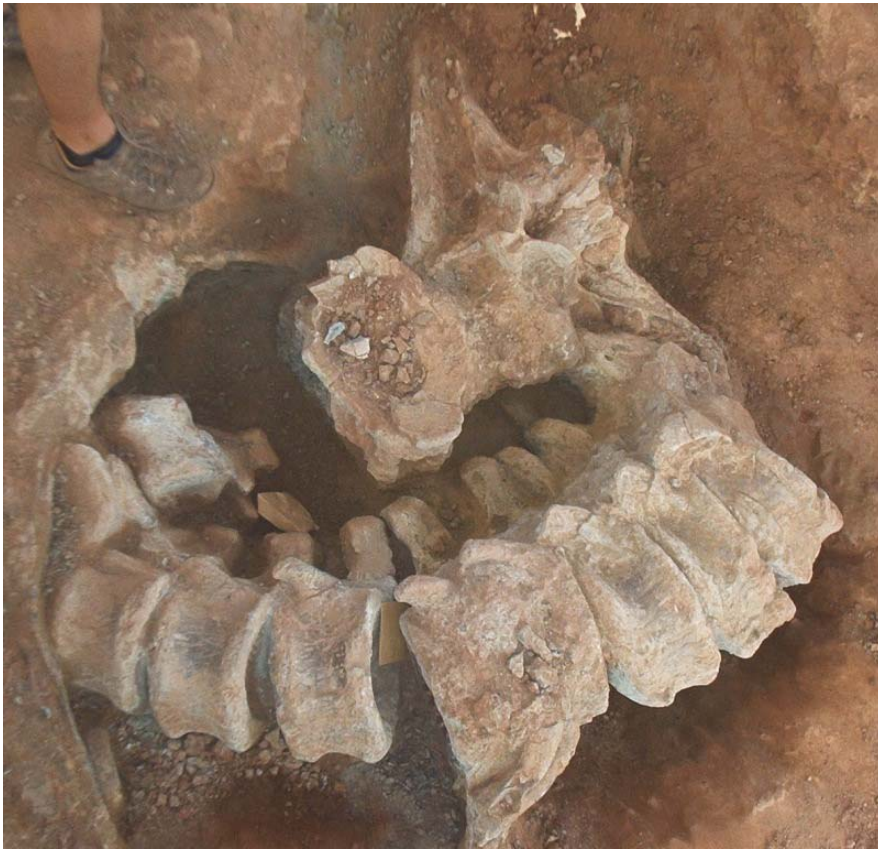

**FIG. S2** Detail of the articulated caudals and the dorsal vertebra just prior to being extracted from the site.
