# Supplementary material for: Europatitan eastwoodi, a new sauropod from the lower Cretaceous of Iberia in the initial radiation of somphospondylans in Laurasia
Source: PeerJ journal article supplement (doi:10.7717/peerj.3409), 2017-06-27
Supplement: Fig._S3._Detail_of_the_excavation_of_the_scapula_MDS-OT,14..pdf [file Fig._S3._Detail_of_the_excavation_of_the_scapula_MDS-OT%2C14..pdf]

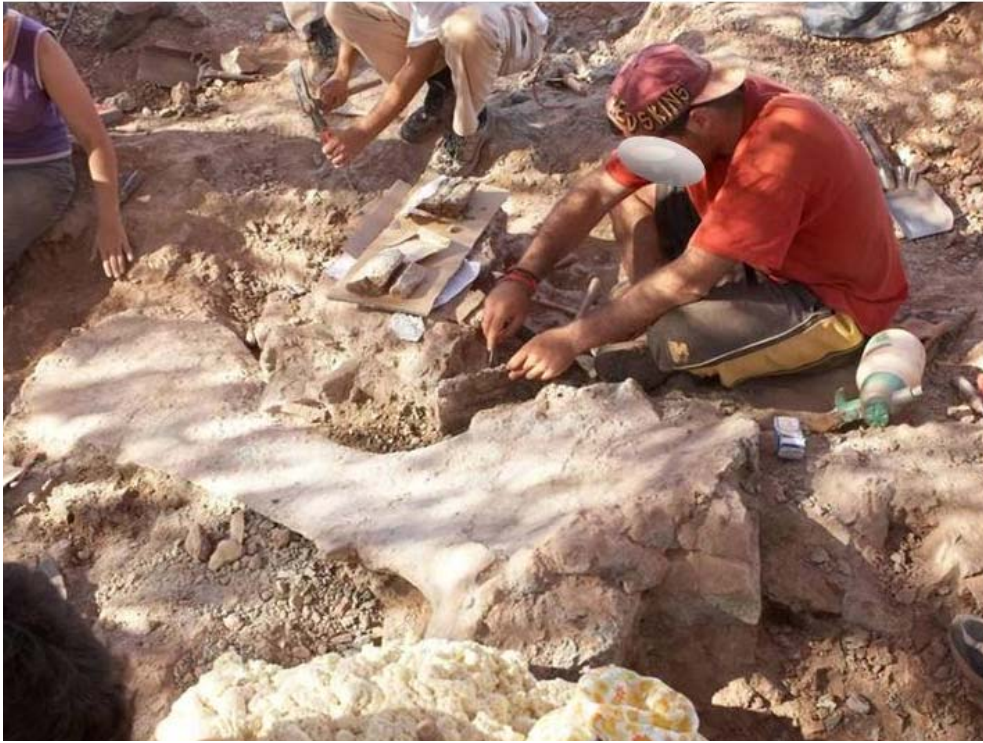

**FIG S3.** Detail of the excavation of the scapula MDS-OT,14.
